# Supplementary material for: KSrScSi2O7:Eu2+: a novel near-UV converting blue-emitting phosphor with high efficiency and excellent thermal stability
Source: Royal Society of Chemistry journal article supplement (doi:10.1039/c3ra42882f), 2013-01-01
Supplement: c3ra42882f.pdf [file c3ra42882f.pdf]

## Supporting Information

$\text{KSrScSi}_2\text{O}_7:\text{Eu}^{2+}$ : a novel near-UV converting blue-emitting phosphor with high efficiency and excellent thermal stability

Sudeshna Ray, Ying-Chien Fang, and Teng Ming Chen <sup>\*a</sup>

**Fig. S1**

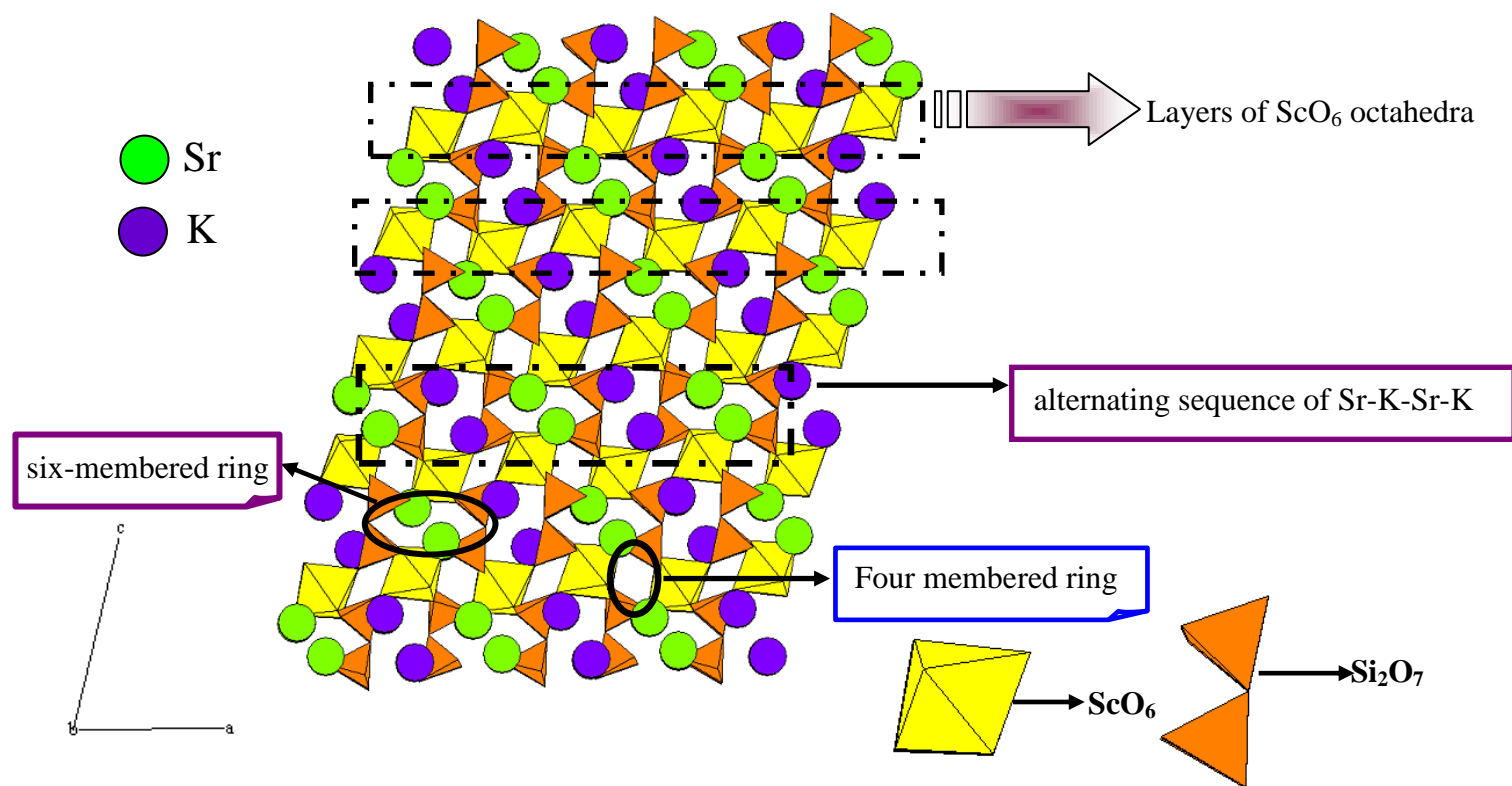

Fig. S1

**Fig. S2**

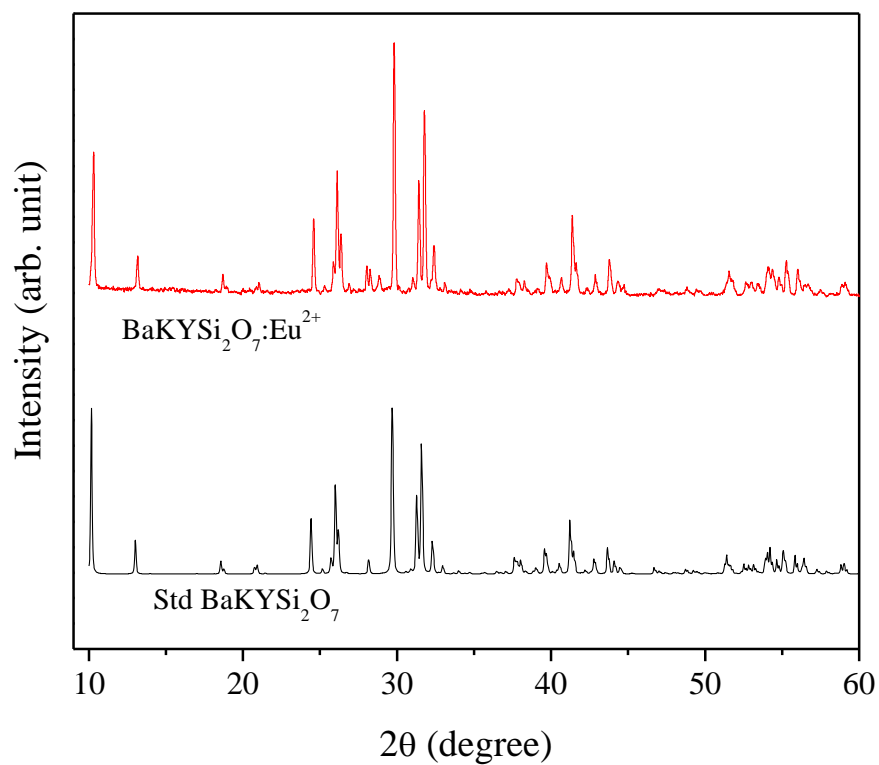

Fig. S2 XRD patterns of sample  $\text{BaKYSi}_2\text{O}_7:\text{Eu}^{2+}$ . The single crystal XRD data of  $\text{BaKYSi}_2\text{O}_7$  is presented for comparison.
